# Supplementary material
Source: Copernicus journal article supplement (doi:10.5194/nhess-26-2841-2026)
Supplement: Supplementary file 1 [file nhess-26-2841-2026-supplement.pdf]

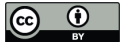

*Supplement of*

**Psychometric and cultural characterization of relative volcanic risk perception levels of individuals highly exposed to proximal activity from Villarrica volcano, Chile**

**Rodrigo A. Calderon et al.**

*Correspondence to:* Rodrigo A. Calderon (rodcaldeb@gmail.com)

The copyright of individual parts of the supplement might differ from the article licence.

Supplementary material

Table S1. Cluster centroids (mean z-scores) for each volcanic risk perception level, reported separately for residents and non-residents.

| VRP level               | Cluster centroids for residents |              |             |              |             |
|-------------------------|---------------------------------|--------------|-------------|--------------|-------------|
|                         | Very low                        | Low          | Moderate    | High         | Very high   |
| Knowledge               | -0.902                          | 0.497        | -0.149      | 0.402        | 0.15        |
| Internal trust          | 0.097                           | 0.344        | -0.191      | 0.08         | 0.017       |
| External trust          | -0.014                          | 0.066        | 0.157       | 0.187        | 0.275       |
| Attachment to the place | 0.107                           | 0.124        | 0.212       | 0.179        | 0.238       |
| <b>Sum</b>              | <b>-0.712</b>                   | <b>0.095</b> | <b>0.03</b> | <b>0.045</b> | <b>0.68</b> |

5

| VRP level      | Cluster centroids for non-residents |                 |                 |                 |                 |
|----------------|-------------------------------------|-----------------|-----------------|-----------------|-----------------|
|                | Low                                 | Very low        | Moderate        | High            | Very high       |
| Knowledge      | 0.011486                            | 0.042361        | 0.182895        | 0.003239        | 0.208327        |
| Internal trust | 0.079202                            | 0.282237        | -0.194326       | 0.041478        | -0.031667       |
| External trust | 0.000095                            | 0.134169        | 0.141596        | 0.172016        | 0.286435        |
| <b>Sum</b>     | <b>-0.06781</b>                     | <b>-0.19043</b> | <b>0.130165</b> | <b>0.210255</b> | <b>0.463095</b> |

10 **Table S2. Anonymized dataset including raw factor scores, standardized z-scores, and final volcanic risk perception level classification**

| ID  | Residency | Settlement | Knowledge | Internal Trust | External Trust | Place Attachment | VRP       |
|-----|-----------|------------|-----------|----------------|----------------|------------------|-----------|
| R1  | Resident  | Rural      | -0.68     | 0.2            | -0.14          | 0.11824457       | Low       |
| R2  | Resident  | Rural      | -0.67     | 0.02           | 0              | -0.0016242       | Very Low  |
| U2  | Resident  | Urban      | -0.12     | -0.19          | 0.15           | 0.23620971       | Moderate  |
| R3  | Resident  | Rural      | -0.85     | 0.2            | 0.28           | 0.11824457       | Very Low  |
| R4  | Resident  | Rural      | -0.32     | 0.2            | 0.15           | 0.35158779       | High      |
| R5  | Resident  | Rural      | -0.5      | -0.13          | 0              | 0.35127313       | High      |
| R6  | Resident  | Rural      | -0.35     | 0.16           | 0.28           | 0.11571589       | High      |
| U6  | Resident  | Urban      | 0         | 0.01           | 0.29           | 0.47170857       | Very High |
| R7  | Resident  | Rural      | -0.32     | 0.31           | -0.14          | -0.00415289      | Low       |
| R8  | Resident  | Rural      | -0.5      | 0.21           | -0.01          | 0.1140597        | Low       |
| U8  | Resident  | Urban      | -0.47     | -0.37          | 0.28           | 0.35127313       | Moderate  |
| R9  | Resident  | Rural      | -0.67     | 0.2            | 0              | 0.00024744       | Low       |
| U9  | Resident  | Urban      | 0.21      | 0              | 0.15           | 0.11821259       | Very High |
| R10 | Resident  | Rural      | -0.53     | 0.2            | -0.14          | 0.11628256       | Low       |
| R11 | Resident  | Rural      | -0.35     | 0.41           | -0.29          | 0.23141319       | Low       |
| U11 | Resident  | Urban      | -0.32     | 0.17           | 0.29           | 0.11603512       | High      |
| R12 | Resident  | Rural      | -0.53     | 0              | 0              | 0.11571589       | High      |
| U12 | Resident  | Urban      | -0.32     | -0.13          | 0.29           | 0.23368103       | Moderate  |
| R13 | Resident  | Rural      | -0.53     | 0.41           | -0.01          | 0.35152057       | Low       |
| U13 | Resident  | Urban      | -0.62     | 0.02           | 0.15           | 0.23558923       | High      |
| R14 | Resident  | Rural      | -0.35     | 0              | -0.01          | 0.11846003       | High      |
| U14 | Resident  | Urban      | 0         | 0.33           | 0.43           | 0.11656523       | Very High |
| R15 | Resident  | Rural      | -0.35     | 0.41           | 0.28           | 0.23392847       | High      |
| U15 | Resident  | Urban      | -0.15     | 0.33           | 0.44           | 0.11799713       | High      |
| R16 | Resident  | Rural      | -0.5      | 0.01           | 0              | -0.00196201      | High      |
| R17 | Resident  | Rural      | -0.33     | 0.25           | 0.28           | -0.00383823      | High      |
| R18 | Resident  | Rural      | -0.47     | 0.2            | 0.28           | 0.11571589       | High      |
| R19 | Resident  | Rural      | -0.53     | 0.05           | 0.14           | 0                | High      |
| R20 | Resident  | Rural      | -0.35     | 0.41           | 0.14           | 0.1141589        | Low       |
| R21 | Resident  | Rural      | -0.82     | 0              | -0.14          | -0.00130954      | Very Low  |
| U21 | Resident  | Urban      | 0.18      | 0.01           | 0.29           | 0.11799713       | Very High |
| R22 | Resident  | Rural      | -0.85     | 0              | 0.15           | -0.00383823      | Very Low  |
| U22 | Resident  | Urban      | 0         | -0.19          | 0.15           | 0.11799713       | Moderate  |
| R23 | Resident  | Rural      | -1.17     | 0.2            | -0.14          | 0.1141589        | Very Low  |
| U23 | Resident  | Urban      | -0.35     | 0.17           | -0.13          | -0.00140874      | Low       |

|     |          |       |       |       |       |             |           |
|-----|----------|-------|-------|-------|-------|-------------|-----------|
| R24 | Resident | Rural | -1    | 0.16  | 0     | 0.23590389  | Very Low  |
| U24 | Resident | Urban | -0.5  | 0.16  | 0.43  | 0.35371145  | High      |
| R25 | Resident | Rural | -0.32 | 0     | 0.14  | 0.23611935  | High      |
| U25 | Resident | Urban | 0.21  | 0.01  | 0.43  | 0.23620971  | Very High |
| R26 | Resident | Rural | -0.18 | 0.16  | 0.28  | 0.00024744  | High      |
| U26 | Resident | Urban | 0.18  | -0.19 | 0.15  | 0.35127313  | Very High |
| R27 | Resident | Rural | -0.18 | 0     | 0.29  | 0.23611935  | Moderate  |
| U27 | Resident | Urban | -0.12 | -0.19 | 0.15  | 0.23580469  | Moderate  |
| R28 | Resident | Rural | -0.32 | 0.2   | -0.01 | 0.35127313  | High      |
| U28 | Resident | Urban | 0.03  | -0.19 | 0.43  | 0.11546844  | Very High |
| R29 | Resident | Rural | -1.03 | 0     | -0.01 | 0.2333752   | Very Low  |
| U29 | Resident | Urban | 0.21  | 0.02  | 0     | -0.00100372 | Very High |
| R30 | Resident | Rural | -0.53 | 0.21  | -0.29 | -0.11930667 | Low       |
| U30 | Resident | Urban | 0     | -0.19 | 0.29  | -0.0035324  | Moderate  |
| R31 | Resident | Rural | -0.35 | 0.4   | -0.01 | -0.00383823 | Low       |
| U31 | Resident | Urban | 0.03  | -0.13 | 0     | 0.23558923  | Moderate  |
| R32 | Resident | Rural | -0.35 | 0.2   | 0.43  | 0.34996359  | High      |
| U32 | Resident | Urban | -0.47 | -0.39 | 0.15  | 0.1140597   | Moderate  |
| R33 | Resident | Rural | -0.35 | 0.4   | 0.28  | 0.35404926  | High      |
| U33 | Resident | Urban | 0.35  | 0.2   | 0.43  | 0.35380181  | Very High |
| R34 | Resident | Rural | -1.17 | -0.19 | 0.14  | 0.23583667  | Very Low  |
| R35 | Resident | Rural | -0.82 | 0     | -0.29 | 0.11546844  | Very Low  |
| U35 | Resident | Urban | 0     | -0.39 | 0.44  | 0.11821259  | Moderate  |
| R36 | Resident | Rural | -0.5  | 0.61  | -0.14 | 0.1140597   | Low       |
| R37 | Resident | Rural | -0.85 | 0.4   | -0.01 | -0.00130954 | Very Low  |
| U37 | Resident | Urban | 0     | 0.22  | 0.28  | 0.23368103  | Very High |
| R38 | Resident | Rural | -0.35 | 0.61  | 0     | 0.23196646  | Low       |
| U38 | Resident | Urban | -0.35 | 0.21  | 0.43  | 0.11799713  | High      |
| R39 | Resident | Rural | -0.88 | 0.16  | -0.14 | -0.00383823 | Very Low  |
| R40 | Resident | Rural | -0.53 | 0.4   | 0.14  | 0.23196646  | Low       |
| R41 | Resident | Rural | -0.67 | 0     | 0     | 0.11571589  | Very Low  |
| R42 | Resident | Rural | -0.5  | 0.2   | 0.14  | 0.23330799  | High      |
| R43 | Resident | Rural | 0     | 0.2   | 0.14  | 0.231751    | Very High |
| R44 | Resident | Rural | -0.67 | 0.41  | 0.15  | 0.23645716  | Low       |
| R45 | Resident | Rural | -0.7  | 0     | -0.14 | 0.35137233  | Very Low  |
| R46 | Resident | Rural | -0.35 | 0.41  | -0.01 | 0.11375387  | Low       |
| U46 | Resident | Urban | -0.27 | 0.33  | 0.29  | 0.23620971  | High      |
| R47 | Resident | Rural | -0.15 | 0.2   | -0.15 | -0.00415289 | Low       |
| U47 | Resident | Urban | -0.18 | -0.18 | 0.28  | 0.35127313  | Moderate  |

|     |          |       |       |       |       |             |           |
|-----|----------|-------|-------|-------|-------|-------------|-----------|
| R48 | Resident | Rural | -1.03 | 0.21  | 0     | 0.11571589  | Very Low  |
| R49 | Resident | Rural | -0.35 | 0.51  | -0.01 | -0.00130954 | Low       |
| R50 | Resident | Rural | -0.85 | 0     | -0.14 | -0.00383823 | Very Low  |
| U50 | Resident | Urban | -0.47 | 0     | 0.44  | 0.23620971  | High      |
| R51 | Resident | Rural | -0.68 | 0.36  | -0.29 | 0.11375387  | Low       |
| U51 | Resident | Urban | 0.35  | 0.17  | 0.29  | 0.1140597   | Very High |
| R52 | Resident | Rural | -0.53 | 0.2   | -0.01 | 0.11375387  | Low       |
| U52 | Resident | Urban | -0.12 | 0.17  | 0     | 0.23306054  | High      |
| R53 | Resident | Rural | -1    | 0.4   | 0.14  | 0.23371301  | Very Low  |
| R54 | Resident | Rural | -0.7  | 0.61  | 0.14  | 0.34996359  | Low       |
| R55 | Resident | Rural | -0.53 | 0     | -0.01 | 0.23645716  | High      |
| R56 | Resident | Rural | -1.03 | 0.16  | 0.28  | 0.11571589  | Very Low  |
| R57 | Resident | Rural | -1    | 0.16  | 0     | 0.11571589  | Very Low  |
| R58 | Resident | Rural | -0.53 | -0.2  | 0     | 0.1141589   | High      |
| R59 | Resident | Rural | -0.88 | 0     | 0.14  | -0.00219088 | Very Low  |
| R60 | Resident | Rural | -0.5  | 0.4   | -0.01 | -0.00130954 | Low       |
| R61 | Resident | Rural | -0.68 | 0.4   | -0.01 | 0.23141319  | Low       |
| R62 | Resident | Rural | -0.32 | 0.4   | 0     | 0.231751    | Low       |
| R63 | Resident | Rural | -0.18 | 0.4   | -0.01 | 0.1140597   | Low       |
| R64 | Resident | Rural | -0.85 | 0.4   | -0.01 | 0.35137233  | Very Low  |
| R65 | Resident | Rural | -0.7  | 0.4   | 0     | -0.00383823 | Low       |
| R66 | Resident | Rural | -0.85 | 0     | 0.14  | 0.11571589  | Very Low  |
| R67 | Resident | Rural | -0.82 | 0.2   | -0.14 | 0.11437436  | Very Low  |
| U67 | Resident | Urban | -0.15 | -0.18 | 0.15  | 0.35380181  | Moderate  |
| R68 | Resident | Rural | -0.88 | 0.2   | 0.14  | -0.00383823 | Very Low  |
| R69 | Resident | Rural | -1    | 0.41  | 0.15  | 0.23590389  | Very Low  |
| U69 | Resident | Urban | 0.21  | -0.08 | 0.43  | 0.23449514  | Very High |
| R70 | Resident | Rural | -0.53 | 0     | -0.14 | -0.00383823 | Low       |
| U70 | Resident | Urban | -0.5  | -0.19 | 0     | 0.23590389  | High      |
| R71 | Resident | Rural | -1    | 0     | -0.14 | -0.1192163  | Very Low  |
| U71 | Resident | Urban | -0.3  | -0.39 | 0.15  | -0.00100372 | Moderate  |
| R72 | Resident | Rural | -0.5  | 0.05  | 0     | 0.11824457  | High      |
| R73 | Resident | Rural | -0.53 | 0     | -0.01 | 0.35158779  | High      |
| U73 | Resident | Urban | -0.18 | 0.01  | 0     | 0.11799713  | Moderate  |
| R74 | Resident | Rural | -0.68 | 0.2   | -0.14 | 0.11375387  | Low       |
| R75 | Resident | Rural | -0.18 | 0.41  | 0.14  | 0.11437436  | Low       |
| U75 | Resident | Urban | -0.18 | 0.01  | 0.43  | 0.00033781  | High      |
| R76 | Resident | Rural | -0.82 | 0.21  | -0.01 | -0.12174499 | Very Low  |
| R77 | Resident | Rural | -1.03 | 0     | -0.14 | 0.11824457  | Very Low  |

|      |          |       |       |       |       |             |           |
|------|----------|-------|-------|-------|-------|-------------|-----------|
| R78  | Resident | Rural | 0     | 0.01  | 0.28  | 0.1140597   | Very High |
| R79  | Resident | Rural | -0.85 | -0.19 | -0.01 | 0.11580625  | Very Low  |
| R80  | Resident | Rural | -1.03 | 0     | -0.01 | 0.11628256  | Very Low  |
| R81  | Resident | Rural | -1    | 0.41  | -0.14 | -0.00383823 | Very Low  |
| R82  | Resident | Rural | -0.35 | 0.41  | -0.14 | -0.00408567 | Low       |
| R83  | Resident | Rural | -1.03 | 0.41  | -0.29 | 0.35349599  | Very Low  |
| R84  | Resident | Rural | -0.82 | 0.51  | -0.15 | 0.231751    | Low       |
| R85  | Resident | Rural | -0.5  | 0.2   | 0     | 0.11391146  | Low       |
| R86  | Resident | Rural | -0.32 | 0.41  | 0     | 0.00033781  | Low       |
| R87  | Resident | Rural | -0.68 | 0.41  | -0.14 | 0.34996359  | Low       |
| U87  | Resident | Urban | -0.32 | 0.22  | 0.28  | -0.00196201 | High      |
| R88  | Resident | Rural | -0.35 | 0.2   | 0.28  | -0.00415289 | High      |
| R89  | Resident | Rural | -1    | 0.2   | -0.29 | -0.00171457 | Very Low  |
| R90  | Resident | Rural | -0.85 | 0.2   | -0.01 | 0.23371301  | Very Low  |
| R91  | Resident | Rural | -0.68 | 0.2   | 0.14  | 0.1140597   | Very Low  |
| R92  | Resident | Rural | -0.67 | 0.2   | -0.29 | -0.00383823 | Low       |
| R93  | Resident | Rural | -0.5  | 0     | 0.14  | -0.0035324  | High      |
| U93  | Resident | Urban | -0.15 | 0.01  | 0.15  | 0.1166556   | Moderate  |
| R94  | Resident | Rural | -0.18 | 0.2   | 0.28  | -0.00130954 | High      |
| R95  | Resident | Rural | -0.68 | 0.21  | -0.29 | 0.34941032  | Low       |
| R96  | Resident | Rural | -1    | 0     | 0.14  | 0.23371301  | Very Low  |
| R97  | Resident | Rural | -0.47 | 0.21  | 0     | 0.23645716  | Low       |
| R98  | Resident | Rural | -0.65 | 0.21  | 0.28  | 0.35137233  | High      |
| R99  | Resident | Rural | -0.82 | -0.08 | -0.14 | -0.00130954 | Very Low  |
| R100 | Resident | Rural | -0.85 | 0     | 0.15  | 0.11799713  | Very Low  |
| R101 | Resident | Rural | -0.35 | 0     | -0.14 | 0.3509673   | High      |
| R102 | Resident | Rural | -0.82 | 0.61  | -0.01 | -0.00130954 | Low       |
| R103 | Resident | Rural | -0.5  | 0.41  | -0.14 | 0.11350643  | Low       |
| R104 | Resident | Rural | -0.33 | 0.25  | 0     | 0.23590389  | Low       |
| R105 | Resident | Rural | -0.68 | 0     | -0.14 | -0.12174499 | Very Low  |
| U116 | Resident | Urban | -0.18 | 0.22  | 0.01  | -0.0016242  | High      |
| U118 | Resident | Urban | -0.32 | -0.19 | 0     | 0.35127313  | Moderate  |
| U130 | Resident | Urban | -0.29 | -0.19 | 0.01  | 0.23620971  | Moderate  |
| U134 | Resident | Urban | -0.15 | -0.19 | 0.44  | 0.11799713  | Moderate  |
| U138 | Resident | Urban | -0.65 | -0.19 | -0.01 | 0.23558923  | Very Low  |
| U143 | Resident | Urban | -0.12 | -0.19 | 0.15  | 0.11625057  | Moderate  |
| U150 | Resident | Urban | -0.47 | -0.19 | 0.29  | 0.23620971  | High      |
| U152 | Resident | Urban | 0.35  | 0.01  | 0.15  | 0.35127313  | Very High |
| U156 | Resident | Urban | 0     | 0.14  | 0.14  | 0.35349599  | Very High |

|      |          |       |       |       |       |             |           |
|------|----------|-------|-------|-------|-------|-------------|-----------|
| U158 | Resident | Urban | -0.45 | -0.19 | 0.14  | 0.11546844  | High      |
| U159 | Resident | Urban | 0.03  | -0.18 | 0.28  | 0.23558923  | Moderate  |
| U160 | Resident | Urban | 0.06  | -0.19 | 0.15  | 0.35127313  | Moderate  |
| U161 | Resident | Urban | 0.03  | 0.01  | 0.57  | 0.35380181  | Very High |
| U162 | Resident | Urban | -0.32 | 0.17  | 0.43  | 0.11821259  | High      |
| U163 | Resident | Urban | 0.21  | -0.19 | 0.29  | 0.23580469  | Very High |
| U164 | Resident | Urban | 0.21  | -0.19 | 0.43  | 0.23580469  | Very High |
| U165 | Resident | Urban | 0.18  | 0.02  | 0.29  | 0.35380181  | Very High |
| U169 | Resident | Urban | 0.03  | 0.02  | 0.29  | 0.23558923  | Very High |
| U170 | Resident | Urban | 0.21  | 0     | 0.29  | 0.35380181  | Very High |
| U173 | Resident | Urban | -0.15 | -0.19 | -0.14 | 0           | Moderate  |
| U174 | Resident | Urban | 0.35  | 0.02  | 0.29  | 0.1140597   | Very High |
| U178 | Resident | Urban | 0.18  | -0.19 | 0.15  | 0.23580469  | Very High |
| U179 | Resident | Urban | -0.5  | 0.22  | -0.14 | 0.23361381  | Low       |
| U180 | Resident | Urban | 0.03  | 0     | 0.29  | 0.23558923  | Very High |
| U185 | Resident | Urban | -0.62 | 0.21  | 0.28  | 0.11658838  | High      |
| U189 | Resident | Urban | 0.35  | 0.01  | 0.15  | 0.35127313  | Very High |
| U193 | Resident | Urban | -0.15 | 0.02  | 0     | 0.35127313  | Moderate  |
| U195 | Resident | Urban | -0.12 | -0.19 | 0.15  | 0.34971614  | Moderate  |
| U196 | Resident | Urban | -0.5  | 0.01  | 0.43  | 0.35158779  | High      |
| U197 | Resident | Urban | -1.12 | -0.37 | 0     | 0.11546844  | Very Low  |
| U199 | Resident | Urban | -0.18 | -0.39 | 0.28  | 0.35105767  | Moderate  |
| U202 | Resident | Urban | -0.18 | -0.33 | 0.28  | 0.46917989  | Moderate  |
| U208 | Resident | Urban | 0.35  | 0.08  | 0.44  | 0.35158779  | Very High |
| U210 | Resident | Urban | 0.18  | -0.37 | -0.14 | 0.00212366  | Moderate  |
| U217 | Resident | Urban | 0.03  | -0.19 | 0.44  | 0.23580469  | Very High |
| U218 | Resident | Urban | -0.32 | -0.39 | 0     | 0.11799713  | Moderate  |
| U220 | Resident | Urban | 0.21  | -0.03 | 0     | 0.1175921   | Very High |
| U224 | Resident | Urban | -0.15 | -0.03 | 0.28  | 0.23558923  | Moderate  |
| U226 | Resident | Urban | -0.3  | -0.39 | 0.15  | 0.1175921   | Moderate  |
| U228 | Resident | Urban | -0.33 | 0.17  | 0.44  | 0.23361381  | High      |
| U234 | Resident | Urban | -0.15 | 0.07  | 0.15  | 0.23583667  | Moderate  |
| U239 | Resident | Urban | -0.3  | 0.01  | 0     | -0.00196201 | High      |
| U240 | Resident | Urban | -0.15 | 0.22  | 0.15  | 0.11628256  | High      |
| U241 | Resident | Urban | -0.59 | -0.13 | 0     | 0.35380181  | High      |
| U242 | Resident | Urban | -0.5  | 0.07  | 0.29  | 0.11821259  | High      |
| U245 | Resident | Urban | -0.15 | 0.02  | 0     | 0.11814537  | Moderate  |
| U246 | Resident | Urban | 0.35  | 0.01  | 0.43  | 0.2342477   | Very High |
| U253 | Resident | Urban | -0.32 | 0.02  | 0.28  | 0.23456236  | High      |

|      |              |       |       |       |       |            |           |
|------|--------------|-------|-------|-------|-------|------------|-----------|
| U262 | Resident     | Urban | -0.62 | -0.33 | 0.14  | 0.23580469 | High      |
| U265 | Resident     | Urban | 0     | -0.39 | 0.15  | 0.35380181 | Moderate  |
| U266 | Resident     | Urban | -0.18 | 0.01  | 0.29  | 0.35127313 | Moderate  |
| U269 | Resident     | Urban | 0.03  | 0.22  | 0.29  | 0.2342477  | Very High |
| U275 | Resident     | Urban | 0.03  | 0.01  | 0.15  | 0.23449514 | Very High |
| U283 | Resident     | Urban | -0.45 | -0.08 | -0.14 | 0.1140597  | High      |
| U284 | Resident     | Urban | -0.47 | 0.22  | 0.14  | 0.47170857 | High      |
| U288 | Resident     | Urban | 0.06  | -0.19 | 0.43  | 0.35380181 | Very High |
| U295 | Resident     | Urban | -0.44 | -0.19 | 0.44  | 0.23620971 | High      |
| U297 | Resident     | Urban | 0     | 0.22  | -0.13 | 0.11350643 | Very High |
| U298 | Resident     | Urban | -0.48 | -0.19 | 0     | 0.11546844 | High      |
| U299 | Resident     | Urban | 0     | -0.19 | 0.15  | 0.23580469 | Moderate  |
| U300 | Resident     | Urban | -0.15 | -0.19 | 0.15  | 0.11625057 | Moderate  |
| U307 | Resident     | Urban | 0.17  | 0.01  | 0.28  | 0.23449514 | Very High |
| U1   | Non-resident | Urban | 0.03  | -0.09 | 0.09  | N/A        | Low       |
| U3   | Non-resident | Urban | 0.21  | 0.09  | -0.07 | N/A        | Low       |
| U4   | Non-resident | Urban | -0.07 | -0.19 | 0.11  | N/A        | Very Low  |
| U5   | Non-resident | Urban | 0.11  | 0.03  | 0.28  | N/A        | Very High |
| U7   | Non-resident | Urban | -0.02 | -0.19 | 0.25  | N/A        | Very Low  |
| U10  | Non-resident | Urban | 0.36  | -0.2  | 0.19  | N/A        | Moderate  |
| U16  | Non-resident | Urban | 0.07  | -0.35 | 0.28  | N/A        | Very Low  |
| U17  | Non-resident | Urban | -0.07 | -0.1  | 0.07  | N/A        | Low       |
| U18  | Non-resident | Urban | 0.21  | -0.19 | 0     | N/A        | Moderate  |
| U19  | Non-resident | Urban | 0.32  | -0.09 | 0.38  | N/A        | Very High |
| U20  | Non-resident | Urban | 0.15  | -0.19 | 0.09  | N/A        | Moderate  |
| U34  | Non-resident | Urban | 0.03  | -0.33 | 0.25  | N/A        | Very Low  |
| U36  | Non-resident | Urban | 0.03  | -0.06 | 0.16  | N/A        | High      |
| U39  | Non-resident | Urban | -0.07 | -0.34 | 0.02  | N/A        | Very Low  |
| U40  | Non-resident | Urban | 0.24  | -0.2  | 0.09  | N/A        | Moderate  |
| U41  | Non-resident | Urban | 0.06  | -0.34 | 0.36  | N/A        | Very Low  |
| U42  | Non-resident | Urban | -0.06 | -0.36 | 0.28  | N/A        | Very Low  |
| U43  | Non-resident | Urban | -0.07 | -0.27 | 0     | N/A        | Very Low  |
| U44  | Non-resident | Urban | -0.13 | -0.25 | -0.07 | N/A        | Very Low  |
| U45  | Non-resident | Urban | -0.02 | -0.19 | 0     | N/A        | Low       |
| U48  | Non-resident | Urban | 0.06  | -0.19 | 0     | N/A        | Low       |
| U49  | Non-resident | Urban | -0.02 | -0.09 | 0.03  | N/A        | Low       |
| U53  | Non-resident | Urban | -0.02 | 0.05  | 0     | N/A        | Low       |
| U54  | Non-resident | Urban | 0.07  | -0.19 | 0     | N/A        | Low       |
| U55  | Non-resident | Urban | 0.03  | -0.09 | 0     | N/A        | Low       |

|      |              |       |       |       |       |     |           |
|------|--------------|-------|-------|-------|-------|-----|-----------|
| U56  | Non-resident | Urban | 0.22  | -0.17 | 0.09  | N/A | Moderate  |
| U57  | Non-resident | Urban | 0.24  | -0.06 | 0.35  | N/A | Very High |
| U58  | Non-resident | Urban | 0.06  | -0.28 | 0.09  | N/A | Very Low  |
| U59  | Non-resident | Urban | 0.24  | -0.21 | 0.25  | N/A | Moderate  |
| U60  | Non-resident | Urban | 0.13  | -0.12 | 0.09  | N/A | Moderate  |
| U61  | Non-resident | Urban | 0.13  | -0.09 | 0.09  | N/A | Moderate  |
| U62  | Non-resident | Urban | 0.32  | -0.09 | 0.19  | N/A | Very High |
| U63  | Non-resident | Urban | 0     | -0.09 | 0     | N/A | Low       |
| U64  | Non-resident | Urban | -0.25 | 0.06  | 0.03  | N/A | High      |
| U65  | Non-resident | Urban | 0.14  | 0.09  | 0.29  | N/A | Very High |
| U66  | Non-resident | Urban | -0.07 | -0.09 | -0.07 | N/A | Low       |
| U68  | Non-resident | Urban | 0.14  | -0.04 | 0.29  | N/A | Very High |
| U72  | Non-resident | Urban | 0.24  | 0.06  | 0.28  | N/A | Very High |
| U74  | Non-resident | Urban | -0.28 | -0.09 | 0.12  | N/A | Very Low  |
| U76  | Non-resident | Urban | 0.24  | -0.24 | 0.28  | N/A | Moderate  |
| U77  | Non-resident | Urban | 0.2   | -0.09 | 0.09  | N/A | Moderate  |
| U78  | Non-resident | Urban | -0.02 | 0.18  | 0.16  | N/A | High      |
| U79  | Non-resident | Urban | -0.04 | 0.15  | 0.09  | N/A | High      |
| U80  | Non-resident | Urban | 0     | -0.33 | 0.25  | N/A | Very Low  |
| U81  | Non-resident | Urban | 0.13  | -0.19 | 0.07  | N/A | Moderate  |
| U82  | Non-resident | Urban | 0     | -0.1  | 0.07  | N/A | Low       |
| U83  | Non-resident | Urban | 0.07  | -0.21 | 0.19  | N/A | Moderate  |
| U84  | Non-resident | Urban | 0.21  | -0.09 | 0.09  | N/A | Moderate  |
| U85  | Non-resident | Urban | -0.12 | -0.33 | 0.02  | N/A | Very Low  |
| U86  | Non-resident | Urban | 0.06  | 0.14  | 0.26  | N/A | High      |
| U88  | Non-resident | Urban | 0.09  | -0.07 | 0.26  | N/A | Very High |
| U89  | Non-resident | Urban | 0.07  | 0.03  | 0.16  | N/A | High      |
| U90  | Non-resident | Urban | 0.13  | 0.13  | 0.36  | N/A | Very High |
| U91  | Non-resident | Urban | 0.23  | -0.09 | 0.16  | N/A | Moderate  |
| U92  | Non-resident | Urban | 0.36  | -0.09 | 0.27  | N/A | Very High |
| U94  | Non-resident | Urban | 0.07  | 0.02  | 0.26  | N/A | High      |
| U95  | Non-resident | Urban | 0.05  | -0.35 | 0.25  | N/A | Very Low  |
| U96  | Non-resident | Urban | -0.17 | -0.09 | 0.45  | N/A | High      |
| U97  | Non-resident | Urban | 0.28  | -0.2  | 0     | N/A | Moderate  |
| U98  | Non-resident | Urban | 0.01  | -0.09 | 0     | N/A | Low       |
| U99  | Non-resident | Urban | 0.17  | 0.04  | 0.35  | N/A | Very High |
| U100 | Non-resident | Urban | 0.12  | -0.03 | 0.12  | N/A | High      |
| U101 | Non-resident | Urban | -0.25 | -0.32 | 0.16  | N/A | Very Low  |
| U102 | Non-resident | Urban | 0.26  | -0.09 | 0.19  | N/A | Very High |

|      |              |       |       |       |       |     |           |
|------|--------------|-------|-------|-------|-------|-----|-----------|
| U103 | Non-resident | Urban | 0.06  | -0.09 | 0.19  | N/A | High      |
| U104 | Non-resident | Urban | 0.07  | -0.17 | 0     | N/A | Low       |
| U105 | Non-resident | Urban | 0.25  | -0.24 | 0.1   | N/A | Moderate  |
| U106 | Non-resident | Urban | 0.23  | -0.12 | 0.19  | N/A | Moderate  |
| U107 | Non-resident | Urban | 0.07  | -0.32 | 0.07  | N/A | Very Low  |
| U108 | Non-resident | Urban | 0.15  | -0.09 | 0.28  | N/A | Very High |
| U109 | Non-resident | Urban | 0     | -0.1  | 0     | N/A | Low       |
| U110 | Non-resident | Urban | 0.05  | -0.09 | 0.35  | N/A | Very High |
| U111 | Non-resident | Urban | -0.02 | -0.28 | 0.1   | N/A | Very Low  |
| U112 | Non-resident | Urban | -0.13 | -0.22 | 0.09  | N/A | Very Low  |
| U113 | Non-resident | Urban | 0.23  | -0.35 | 0.03  | N/A | Moderate  |
| U114 | Non-resident | Urban | -0.1  | 0.13  | 0.02  | N/A | High      |
| U115 | Non-resident | Urban | 0.03  | -0.32 | 0.09  | N/A | Very Low  |
| U117 | Non-resident | Urban | -0.12 | -0.04 | 0.1   | N/A | High      |
| U119 | Non-resident | Urban | 0     | -0.43 | 0.09  | N/A | Very Low  |
| U120 | Non-resident | Urban | 0.11  | -0.24 | 0.19  | N/A | Moderate  |
| U121 | Non-resident | Urban | 0.09  | 0     | 0.18  | N/A | High      |
| U122 | Non-resident | Urban | 0.18  | -0.1  | 0.09  | N/A | Moderate  |
| U123 | Non-resident | Urban | 0.13  | -0.19 | 0.1   | N/A | Moderate  |
| U124 | Non-resident | Urban | 0.06  | -0.19 | -0.07 | N/A | Low       |
| U125 | Non-resident | Urban | 0.14  | 0.03  | 0     | N/A | Low       |
| U126 | Non-resident | Urban | 0.08  | -0.19 | -0.07 | N/A | Low       |
| U127 | Non-resident | Urban | 0.04  | -0.21 | 0.28  | N/A | Very Low  |
| U128 | Non-resident | Urban | -0.07 | -0.06 | 0.09  | N/A | Low       |
| U129 | Non-resident | Urban | 0     | -0.16 | -0.07 | N/A | Low       |
| U131 | Non-resident | Urban | 0.15  | -0.2  | 0.07  | N/A | Moderate  |
| U132 | Non-resident | Urban | 0.05  | -0.25 | 0.16  | N/A | Very Low  |
| U133 | Non-resident | Urban | 0.05  | -0.52 | 0.19  | N/A | Very Low  |
| U135 | Non-resident | Urban | -0.07 | 0.03  | 0.03  | N/A | Low       |
| U136 | Non-resident | Urban | -0.13 | -0.24 | 0.1   | N/A | Very Low  |
| U137 | Non-resident | Urban | -0.04 | -0.21 | 0.26  | N/A | Very Low  |
| U139 | Non-resident | Urban | -0.37 | -0.2  | 0.19  | N/A | Very Low  |
| U140 | Non-resident | Urban | 0.14  | 0.25  | 0.1   | N/A | High      |
| U141 | Non-resident | Urban | 0.28  | -0.1  | 0.19  | N/A | Very High |
| U142 | Non-resident | Urban | 0.2   | 0.05  | 0.35  | N/A | Very High |
| U144 | Non-resident | Urban | 0.06  | -0.21 | 0.29  | N/A | Moderate  |
| U145 | Non-resident | Urban | -0.02 | -0.1  | 0.29  | N/A | High      |
| U146 | Non-resident | Urban | 0.19  | -0.12 | 0.28  | N/A | Very High |
| U147 | Non-resident | Urban | 0.2   | -0.3  | 0.17  | N/A | Moderate  |

|      |              |       |       |       |       |     |           |
|------|--------------|-------|-------|-------|-------|-----|-----------|
| U148 | Non-resident | Urban | 0     | -0.33 | 0.1   | N/A | Very Low  |
| U149 | Non-resident | Urban | 0.01  | -0.06 | 0.1   | N/A | Low       |
| U151 | Non-resident | Urban | -0.15 | -0.09 | 0.09  | N/A | Low       |
| U153 | Non-resident | Urban | 0     | -0.1  | 0.16  | N/A | High      |
| U154 | Non-resident | Urban | 0.13  | 0.06  | 0.12  | N/A | High      |
| U155 | Non-resident | Urban | -0.04 | -0.07 | 0.09  | N/A | Low       |
| U157 | Non-resident | Urban | 0.22  | 0.03  | 0     | N/A | Low       |
| U166 | Non-resident | Urban | 0.31  | -0.09 | 0.19  | N/A | Very High |
| U167 | Non-resident | Urban | 0.13  | -0.24 | 0.02  | N/A | Moderate  |
| U168 | Non-resident | Urban | 0.13  | -0.09 | 0.17  | N/A | Moderate  |
| U171 | Non-resident | Urban | 0.2   | -0.33 | 0.19  | N/A | Moderate  |
| U172 | Non-resident | Urban | 0.43  | -0.33 | 0.12  | N/A | Moderate  |
| U175 | Non-resident | Urban | 0.22  | -0.09 | 0.09  | N/A | Moderate  |
| U176 | Non-resident | Urban | 0.09  | -0.17 | 0     | N/A | Low       |
| U177 | Non-resident | Urban | 0.05  | 0.03  | 0.07  | N/A | High      |
| U181 | Non-resident | Urban | 0.14  | -0.1  | 0.11  | N/A | Moderate  |
| U182 | Non-resident | Urban | 0.16  | -0.33 | 0.12  | N/A | Moderate  |
| U183 | Non-resident | Urban | -0.07 | -0.08 | 0.19  | N/A | High      |
| U184 | Non-resident | Urban | -0.02 | -0.2  | 0.09  | N/A | Very Low  |
| U186 | Non-resident | Urban | -0.13 | -0.34 | -0.12 | N/A | Very Low  |
| U187 | Non-resident | Urban | 0.07  | 0.01  | 0.35  | N/A | Very High |
| U188 | Non-resident | Urban | 0.07  | -0.09 | 0.25  | N/A | Very High |
| U190 | Non-resident | Urban | -0.02 | -0.22 | 0.35  | N/A | Very Low  |
| U191 | Non-resident | Urban | 0.08  | -0.21 | 0.16  | N/A | Moderate  |
| U192 | Non-resident | Urban | 0.05  | -0.29 | 0.16  | N/A | Very Low  |
| U194 | Non-resident | Urban | -0.17 | -0.04 | 0.28  | N/A | High      |
| U198 | Non-resident | Urban | 0.07  | -0.43 | 0.07  | N/A | Very Low  |
| U200 | Non-resident | Urban | 0.13  | -0.12 | 0.21  | N/A | Moderate  |
| U201 | Non-resident | Urban | -0.07 | -0.22 | 0.1   | N/A | Very Low  |
| U203 | Non-resident | Urban | 0.3   | -0.12 | 0.28  | N/A | Very High |
| U204 | Non-resident | Urban | 0.13  | 0.09  | 0.09  | N/A | High      |
| U205 | Non-resident | Urban | 0.07  | 0.15  | 0.25  | N/A | High      |
| U206 | Non-resident | Urban | -0.07 | 0.1   | 0.1   | N/A | High      |
| U207 | Non-resident | Urban | 0.14  | 0     | 0.28  | N/A | Very High |
| U209 | Non-resident | Urban | 0.15  | 0.09  | 0.19  | N/A | High      |
| U211 | Non-resident | Urban | 0.06  | -0.06 | 0     | N/A | Low       |
| U212 | Non-resident | Urban | 0.15  | 0.03  | 0     | N/A | Low       |
| U213 | Non-resident | Urban | -0.13 | 0     | 0.02  | N/A | Low       |
| U214 | Non-resident | Urban | -0.07 | 0.03  | 0.19  | N/A | High      |

|      |              |       |       |       |       |     |           |
|------|--------------|-------|-------|-------|-------|-----|-----------|
| U215 | Non-resident | Urban | 0     | -0.09 | 0.25  | N/A | High      |
| U216 | Non-resident | Urban | -0.06 | -0.31 | 0.36  | N/A | Very Low  |
| U219 | Non-resident | Urban | 0.1   | -0.09 | -0.07 | N/A | Low       |
| U221 | Non-resident | Urban | 0.07  | -0.2  | 0.09  | N/A | Moderate  |
| U222 | Non-resident | Urban | -0.07 | 0.18  | 0.19  | N/A | High      |
| U223 | Non-resident | Urban | 0.38  | -0.09 | 0.26  | N/A | Very High |
| U225 | Non-resident | Urban | 0     | -0.09 | 0.02  | N/A | Low       |
| U227 | Non-resident | Urban | 0     | 0     | 0.09  | N/A | High      |
| U229 | Non-resident | Urban | 0.25  | -0.33 | 0.25  | N/A | Moderate  |
| U230 | Non-resident | Urban | 0     | -0.2  | 0.09  | N/A | Very Low  |
| U231 | Non-resident | Urban | 0     | -0.03 | 0.07  | N/A | Low       |
| U232 | Non-resident | Urban | -0.02 | -0.28 | 0.09  | N/A | Very Low  |
| U233 | Non-resident | Urban | 0.01  | 0.06  | 0.16  | N/A | High      |
| U235 | Non-resident | Urban | -0.02 | -0.09 | -0.07 | N/A | Low       |
| U236 | Non-resident | Urban | -0.13 | -0.11 | 0.09  | N/A | Low       |
| U237 | Non-resident | Urban | 0     | 0.13  | 0.09  | N/A | High      |
| U238 | Non-resident | Urban | 0.26  | -0.05 | 0.35  | N/A | Very High |
| U243 | Non-resident | Urban | 0.43  | 0.05  | 0.38  | N/A | Very High |
| U244 | Non-resident | Urban | 0.22  | -0.21 | 0.18  | N/A | Moderate  |
| U247 | Non-resident | Urban | 0.15  | -0.21 | 0.16  | N/A | Moderate  |
| U248 | Non-resident | Urban | 0.05  | -0.09 | 0.09  | N/A | Low       |
| U249 | Non-resident | Urban | 0.17  | -0.02 | 0.25  | N/A | Very High |
| U250 | Non-resident | Urban | 0.13  | -0.09 | 0.19  | N/A | Very High |
| U251 | Non-resident | Urban | 0.05  | -0.17 | 0.16  | N/A | Moderate  |
| U252 | Non-resident | Urban | 0.13  | -0.17 | 0.36  | N/A | Very High |
| U254 | Non-resident | Urban | -0.13 | -0.28 | 0.07  | N/A | Very Low  |
| U255 | Non-resident | Urban | -0.01 | -0.09 | -0.22 | N/A | Low       |
| U256 | Non-resident | Urban | 0.14  | -0.09 | 0.25  | N/A | Very High |
| U257 | Non-resident | Urban | -0.12 | 0     | 0.28  | N/A | High      |
| U258 | Non-resident | Urban | -0.15 | 0.17  | 0.1   | N/A | High      |
| U259 | Non-resident | Urban | 0.02  | -0.31 | 0.09  | N/A | Very Low  |
| U260 | Non-resident | Urban | 0.25  | 0.05  | 0.28  | N/A | Very High |
| U261 | Non-resident | Urban | 0.02  | 0     | 0.19  | N/A | High      |
| U263 | Non-resident | Urban | -0.13 | -0.12 | 0.19  | N/A | Very Low  |
| U264 | Non-resident | Urban | 0.32  | 0.02  | 0.35  | N/A | Very High |
| U267 | Non-resident | Urban | 0.32  | 0.05  | 0.29  | N/A | Very High |
| U268 | Non-resident | Urban | 0     | 0.03  | 0.29  | N/A | High      |
| U270 | Non-resident | Urban | 0.25  | 0.17  | 0.21  | N/A | Very High |
| U271 | Non-resident | Urban | -0.04 | 0.02  | 0.19  | N/A | High      |

|      |              |       |       |       |       |     |           |
|------|--------------|-------|-------|-------|-------|-----|-----------|
| U272 | Non-resident | Urban | -0.02 | -0.34 | 0     | N/A | Very Low  |
| U273 | Non-resident | Urban | 0.21  | -0.1  | 0.25  | N/A | Very High |
| U274 | Non-resident | Urban | 0.13  | -0.2  | 0.19  | N/A | Moderate  |
| U276 | Non-resident | Urban | -0.07 | -0.09 | 0.1   | N/A | Low       |
| U277 | Non-resident | Urban | 0.08  | -0.08 | 0.16  | N/A | High      |
| U278 | Non-resident | Urban | -0.05 | -0.31 | 0     | N/A | Very Low  |
| U279 | Non-resident | Urban | -0.19 | 0.07  | 0.17  | N/A | High      |
| U280 | Non-resident | Urban | 0.12  | -0.09 | 0.35  | N/A | Very High |
| U281 | Non-resident | Urban | 0.13  | 0.04  | 0.29  | N/A | Very High |
| U282 | Non-resident | Urban | 0.07  | 0.17  | 0.1   | N/A | High      |
| U285 | Non-resident | Urban | 0     | 0.03  | 0.1   | N/A | High      |
| U286 | Non-resident | Urban | 0.01  | -0.03 | 0.25  | N/A | High      |
| U287 | Non-resident | Urban | -0.02 | 0     | 0.16  | N/A | High      |
| U289 | Non-resident | Urban | 0.32  | -0.2  | 0.16  | N/A | Moderate  |
| U290 | Non-resident | Urban | 0.12  | -0.09 | 0.18  | N/A | Moderate  |
| U291 | Non-resident | Urban | 0.09  | 0.03  | 0.16  | N/A | High      |
| U292 | Non-resident | Urban | -0.13 | -0.09 | -0.07 | N/A | Low       |
| U293 | Non-resident | Urban | -0.02 | -0.09 | 0.16  | N/A | High      |
| U294 | Non-resident | Urban | 0.07  | 0.01  | -0.29 | N/A | Low       |
| U296 | Non-resident | Urban | 0.12  | -0.31 | 0.35  | N/A | Moderate  |
| U301 | Non-resident | Urban | 0.22  | -0.21 | 0.18  | N/A | Moderate  |
| U302 | Non-resident | Urban | 0.22  | -0.09 | 0.26  | N/A | Very High |
| U303 | Non-resident | Urban | 0.19  | -0.09 | 0.25  | N/A | Very High |
| U304 | Non-resident | Urban | -0.02 | -0.21 | 0.02  | N/A | Very Low  |
| U305 | Non-resident | Urban | 0.14  | 0.32  | 0.29  | N/A | High      |
| U306 | Non-resident | Urban | 0.18  | 0.03  | 0.35  | N/A | Very High |
